# Supplementary material
Source: publisher figshare collection journal article supplement (https://sage.figshare.com/ndownloader/files/12784784)
Supplement: Supplementary file 1 [file 12784784]

## Supplemental Appendix for Coethnic Mobilization of Asian Americans: Examining Support for the Black Lives Matter Movement

Figure 1: Letter with a White Author



#BLM

*The Pen is Mightier...*

[About Us](#) [Other Letters](#) [Get Involved](#)

   

---

### A WHITE AMERICAN'S LETTER IN SUPPORT OF THE BLACK LIVES MATTER MOVEMENT

By James Smith

Dear Community Members,

I am writing this letter to you, because [I am worried for black lives](#). While blacks only make up 13% of the population in the United States, they make up a quarter of those killed by police in 2016. Among these killings were Philando Castile in Minneapolis, MN and Walter Scott in Charleston, SC. In both cases, video evidence demonstrated that they were shot for apparently no reason at all.

When confronted with high profile killings, we often try to justify what happened or argue that this could not happen to people like me. In this sense, [we disconnect ourselves from the plight of the black community](#). We argue that whites face discrimination and have friendly relationships with the police, so why can't blacks. While it is true that we face prejudices, being perceived as a threat is not one of them. Even though we do not face these same particular threats, we must be able to empathize with the victims, families, and friends who lost loved ones at the hands of law enforcement.

If that is not enough to change your mind, then let me remind you [that by addressing racial inequality in one area, we will all benefit](#). While we face different challenges, our fates are undeniably tied to the black community. Moreover, the black community has fought for and many died for the protections that we enjoy today. There would be no Civil Rights Act or Voting Rights Act, which expand opportunities for all racial/ethnic groups without the sacrifices made by many African Americans in the 1950's and 1960's.

Because our brothers and sisters are dying, [we need to stand up and speak out about the injustices that blacks are facing today](#). For this reason, I ask you to support the Black Lives Matter Movement.



About the Author: *James Smith* has been a journalist in Ohio for two decades and was most recently a primary columnist for the *Ohio News*. Follow him on Twitter: *@jamespsmith*. The views expressed are his own.

Figure 2: Letter with a Asian American Author



#BLM

*The Pen is Mightier...*

[About Us](#) [Other Letters](#) [Get Involved](#)

   

---

## AN ASIAN AMERICAN'S LETTER IN SUPPORT OF THE BLACK LIVES MATTER MOVEMENT

By CJ LEE

Dear Community Members,

I am writing this letter to you, because [I am worried for black lives](#). While blacks only make up 13% of the population in the United States, they make up a quarter of those killed by police in 2016. Among these killings were Philando Castile in Minneapolis, MN and Walter Scott in Charleston, SC. In both cases, video evidence demonstrated that they were shot for apparently no reason at all.

When confronted with high profile killings, we often try to justify what happened or argue that this could not happen to people like me. In this sense, [we disconnect ourselves from the plight of the black community](#). We argue that Asian Americans face discrimination and have friendly relationships with the police, so why can't blacks. While it is true that we face prejudices, being perceived as a threat is not one of them. Even though we do not face these same particular threats, we must be able to empathize with the victims, families, and friends who lost loved ones at the hands of law enforcement.

If that is not enough to change your mind, then let me remind you [that by addressing racial inequality in one area, we will all benefit](#). While we face different challenges, our fates are undeniably tied to the black community. Moreover, the black community has fought for and many died for the protections that we enjoy today. There would be no Civil Rights Act or Voting Rights Act, which expand opportunities for all racial/ethnic groups without the sacrifices made by many African Americans in the 1950's and 1960's.

Because our brothers and sisters are dying, [we need to stand up and speak out about the injustices that blacks are facing today](#). For this reason, I ask you to support the Black Lives Matter Movement.



About the Author: CJ Lee has been a journalist in Ohio for two decades and was most recently a primary columnist for the Ohio News. Follow him on Twitter: @cjlee. The views expressed are his own.

Table SA. 1: OLS Regression Predicting BLM Feeling Thermometer Scores and BLM Support for Asian Americans using Asian American Linked Fate as an Interaction

|                                       | A: BLM Feeling Therm | B: BLM Support |
|---------------------------------------|----------------------|----------------|
| White Author                          | 21.84*               | 0.88*          |
|                                       | (12.45)              | (0.51)         |
| Asian American Author                 | 8.55                 | 0.13           |
|                                       | (10.50)              | (0.43)         |
| Low Linked Fate                       | 4.70                 | -0.68          |
|                                       | (15.75)              | (0.64)         |
| Some Linked Fate                      | -1.63                | 0.02           |
|                                       | (10.67)              | (0.44)         |
| A Lot of Linked Fate                  | 16.97*               | 0.41           |
|                                       | (9.59)               | (0.39)         |
| White Author*Low Linked Fate          | -23.25               | -0.22          |
|                                       | (26.20)              | (1.05)         |
| White Author*Some Linked Fate         | -3.02                | -0.76          |
|                                       | (15.16)              | (0.62)         |
| White Author*A Lot of Linked Fate     | -17.00               | -0.65          |
|                                       | (13.98)              | (0.57)         |
| Asian Am. Author*Low Linked Fate      | -12.87               | 0.47           |
|                                       | (21.68)              | (0.87)         |
| Asian Am. Author*Some Linked Fate     | 17.17                | 0.36           |
|                                       | (13.75)              | (0.56)         |
| Asian Am. Author*A Lot of Linked Fate | -8.39                | 0.02           |
|                                       | (12.48)              | (0.51)         |
| Female                                | 8.45**               | 0.27*          |
|                                       | (3.73)               | (0.15)         |
| Age                                   | -0.22                | -0.01          |
|                                       | (0.22)               | (0.01)         |
| Income                                | 0.02                 | 0.00           |
|                                       | (0.05)               | (0.00)         |
| Education                             | 0.59                 | 0.05           |
|                                       | (1.34)               | (0.05)         |
| Democrat                              | 13.33***             | 0.51***        |
|                                       | (4.32)               | (0.17)         |
| Republican                            | -21.29***            | -0.89***       |
|                                       | (6.81)               | (0.27)         |
| Discrimination                        | 1.21                 | 0.09           |
|                                       | (4.15)               | (0.17)         |
| Mobilization                          | 10.59**              | 0.39**         |
|                                       | (4.71)               | (0.19)         |
| Native Born                           | 0.47                 | 0.06           |
|                                       | (4.19)               | (0.17)         |
| East Asian Nationality                | -1.85                | -0.06          |
|                                       | (3.75)               | (0.15)         |
| Constant                              | 31.32                | 2.37***        |

|              | (20.57) | (0.82) |
|--------------|---------|--------|
| Observations | 217     | 215    |
| R-squared    | 0.28    | 0.27   |

\* p<0.1, \*\* p<0.05, \*\*\* p<0.01. Standard Error in Parentheses.

Table SA.2 OLS Regression Predicting BLM Feeling Thermometer Scores and BLM Support for Asian Americans by Party

|                 | Democrat           | Independent       | Republican         | Democrat          | Independent       | Republican      |
|-----------------|--------------------|-------------------|--------------------|-------------------|-------------------|-----------------|
|                 | BLM Feeling Therm  |                   |                    | BLM Support       |                   |                 |
| White Author    | 6.16<br>(5.39)     | 18.11<br>(13.36)  | 13.87<br>(17.36)   | 0.03<br>(0.22)    | 0.65<br>(0.47)    | 0.73<br>(0.99)  |
| Asian Am Author | 3.51<br>(5.24)     | 15.60<br>(12.01)  | 4.90<br>(21.63)    | -0.00<br>(0.21)   | 0.55<br>(0.41)    | -0.02<br>(1.20) |
| Female          | 8.83**<br>(4.28)   | 22.02**<br>(9.85) | -17.97<br>(14.25)  | 0.16<br>(0.17)    | 1.07***<br>(0.35) | -0.93<br>(0.79) |
| Age             | 0.02<br>(0.27)     | -0.92<br>(0.58)   | 0.58<br>(0.77)     | -0.01<br>(0.01)   | -0.02<br>(0.02)   | -0.02<br>(0.04) |
| Income          | 0.01<br>(0.05)     | 0.01<br>(0.14)    | -0.16<br>(0.17)    | 0.00<br>(0.00)    | 0.00<br>(0.00)    | -0.01<br>(0.01) |
| Education       | 0.49<br>(1.63)     | 1.79<br>(2.99)    | 8.11<br>(4.84)     | 0.04<br>(0.07)    | 0.05<br>(0.11)    | 0.28<br>(0.29)  |
| Mobilization    | 8.44<br>(5.35)     | 10.62<br>(12.05)  | -6.52<br>(15.90)   | 0.18<br>(0.22)    | 0.57<br>(0.45)    | -0.05<br>(0.98) |
| Discrimination  | -0.61<br>(4.94)    | -9.69<br>(12.05)  | 27.31**<br>(12.38) | 0.30<br>(0.20)    | -0.78*<br>(0.41)  | 0.97<br>(0.75)  |
| Native Born     | 2.32<br>(4.98)     | 2.66<br>(10.16)   | -20.63<br>(13.95)  | 0.06<br>(0.20)    | 0.09<br>(0.36)    | -0.92<br>(0.79) |
| Constant        | 51.12**<br>(24.14) | 35.56<br>(44.87)  | -97.90<br>(88.82)  | 3.12***<br>(0.97) | 2.65*<br>(1.49)   | -0.52<br>(5.33) |
| Observations    | 129                | 50                | 25                 | 128               | 50                | 24              |
| R-squared       | 0.07               | 0.26              | 0.49               | 0.05              | 0.35              | 0.34            |

\* p<0.1, \*\* p<0.05, \*\*\* p<0.01. Standard Error in Parentheses.

Table SA.3 OLS Regression Predicting BLM Feeling Thermometer Scores and BLM Support for Whites by Party

|                 | Democrat          | Independent | Republican | Democrat    | Independent | Republican |
|-----------------|-------------------|-------------|------------|-------------|-------------|------------|
|                 | BLM Feeling Therm |             |            | BLM Support |             |            |
| White Author    | 13.14*            | 5.29        | 20.45**    | 0.44        | 0.30        | 0.70       |
|                 | (7.44)            | (9.92)      | (9.98)     | (0.28)      | (0.47)      | (0.42)     |
| Asian Am Author | 11.53             | 5.25        | -0.55      | 0.26        | 0.09        | -0.29      |
|                 | (7.92)            | (9.64)      | (10.25)    | (0.29)      | (0.46)      | (0.43)     |
| -Female         | 11.69*            | 14.59*      | 10.94      | 0.44*       | 0.45        | 0.41       |
|                 | (6.31)            | (7.77)      | (8.37)     | (0.23)      | (0.37)      | (0.35)     |
| Age             | 0.06              | 0.60*       | -0.26      | 0.00        | 0.01        | -0.02      |
|                 | (0.26)            | (0.31)      | (0.29)     | (0.01)      | (0.01)      | (0.01)     |
| Income          | -0.02             | -0.07       | -0.02      | -0.00       | -0.00       | -0.00      |
|                 | (0.09)            | (0.12)      | (0.11)     | (0.00)      | (0.01)      | (0.00)     |
| Education       | 0.64              | 2.31        | -1.02      | 0.07        | 0.08        | -0.03      |
|                 | (2.03)            | (2.23)      | (2.45)     | (0.07)      | (0.11)      | (0.10)     |
| Mobilization    | 7.93              | 16.45       | -0.95      | 0.16        | 0.21        | -0.00      |
|                 | (6.72)            | (10.61)     | (8.42)     | (0.25)      | (0.50)      | (0.36)     |
| Discrimination  | -8.94             | -15.05*     | -15.79*    | -0.44*      | -0.45       | -0.64*     |
|                 | (6.43)            | (8.34)      | (8.23)     | (0.24)      | (0.40)      | (0.35)     |
| Native Born     | 9.51              | -10.41      |            | 0.62        | -0.09       |            |
|                 | (20.54)           | (22.41)     |            | (0.76)      | (1.07)      |            |
| Constant        | 31.16             | -10.95      | 51.44      | 1.89        | 1.10        | 3.29**     |
|                 | (40.43)           | (41.45)     | (37.90)    | (1.49)      | (1.97)      | (1.60)     |
| Observations    | 86                | 56          | 68         | 85          | 56          | 68         |
| R-squared       | 0.12              | 0.24        | 0.17       | 0.13        | 0.10        | 0.18       |

\* p<0.1, \*\* p<0.05, \*\*\* p<0.01. Standard Error in Parentheses.

Table SA.4 OLS Regression Predicting BLM Feeling Thermometer Scores and BLM Support for Asian Americans by Regional Nationality

|                 | BLM Support       |                   |                   | BLM Feeling Thermometer Score |                   |                    |
|-----------------|-------------------|-------------------|-------------------|-------------------------------|-------------------|--------------------|
|                 | East Asian        | South Asian       | South East Asian  | East Asian                    | South Asian       | South East Asian   |
| White Author    | 0.28<br>(0.28)    | 0.10<br>(0.40)    | 0.71*<br>(0.41)   | 9.77<br>(7.53)                | 10.24<br>(8.84)   | 18.00*<br>(9.24)   |
| Asian Am Author | 0.31<br>(0.26)    | 0.01<br>(0.41)    | 0.22<br>(0.39)    | 9.13<br>(6.96)                | 2.51<br>(9.23)    | 5.17<br>(8.76)     |
| Female          | 0.41*<br>(0.22)   | -0.15<br>(0.32)   | 0.42<br>(0.33)    | 10.08*<br>(5.77)              | 4.04<br>(7.17)    | 8.66<br>(7.41)     |
| Age             | -0.02<br>(0.01)   | 0.00<br>(0.02)    | 0.00<br>(0.03)    | -0.36<br>(0.31)               | 0.05<br>(0.48)    | 0.07<br>(0.57)     |
| Income          | -0.00<br>(0.00)   | 0.00<br>(0.00)    | 0.00<br>(0.00)    | 0.01<br>(0.07)                | 0.06<br>(0.10)    | 0.12<br>(0.09)     |
| Education       | 0.12*<br>(0.07)   | 0.09<br>(0.11)    | -0.22<br>(0.14)   | 1.61<br>(1.88)                | 4.25*<br>(2.44)   | -3.25<br>(3.21)    |
| Democrat        | 0.60***<br>(0.22) | 0.38<br>(0.42)    | 0.81*<br>(0.45)   | 16.54***<br>(5.97)            | 10.47<br>(9.44)   | 22.49**<br>(10.24) |
| Republican      | -0.26<br>(0.50)   | -1.36**<br>(0.62) | -0.67<br>(0.55)   | -7.39<br>(13.40)              | -19.80<br>(13.94) | -20.26<br>(12.29)  |
| Mobilization    | 0.68**<br>(0.29)  | 0.36<br>(0.35)    | -0.05<br>(0.39)   | 14.45*<br>(7.65)              | 15.98*<br>(7.98)  | -6.08<br>(8.60)    |
| Discrimination  | 0.09<br>(0.24)    | 0.23<br>(0.36)    | 0.29<br>(0.39)    | 3.04<br>(6.60)                | 3.80<br>(8.34)    | 5.30<br>(8.72)     |
| Native Born     | 0.30<br>(0.25)    | -0.07<br>(0.33)   | -0.45<br>(0.37)   | 7.57<br>(6.80)                | -4.48<br>(7.56)   | -7.84<br>(8.27)    |
| Constant        | 1.19<br>(1.05)    | 1.75<br>(1.63)    | 5.97***<br>(1.83) | 16.81<br>(28.20)              | -20.42<br>(41.52) | 80.54*<br>(42.43)  |
| Observations    | 110               | 44                | 60                | 111                           | 44                | 60                 |
| R-squared       | 0.26              | 0.33              | 0.31              | 0.23                          | 0.32              | 0.40               |

\* p<0.1, \*\* p<0.05, \*\*\* p<0.01. Standard Error in Parentheses.

Table SA.5 OLS Regression Predicting BLM Feeling Thermometer Scores and BLM Support for Asian Americans with Interaction for Mobilization

|                           | A:<br>BLM Feeling<br>Thermometer | B:<br>BLM<br>Support |
|---------------------------|----------------------------------|----------------------|
| White Author              | 12.45***<br>(4.74)               | 0.50***<br>(0.19)    |
| Asian Am Author           | 4.41<br>(4.69)                   | 0.21<br>(0.19)       |
| Mobilized                 | 7.33<br>(6.59)                   | 0.27<br>(0.27)       |
| White Author*Mobilized    | -6.82<br>(9.40)                  | -0.41<br>(0.38)      |
| Asian Am Author*Mobilized | 11.02<br>(9.35)                  | 0.38<br>(0.38)       |
| Female                    | 8.11**<br>(3.44)                 | 0.27*<br>(0.14)      |
| Age                       | -0.16<br>(0.21)                  | -0.01<br>(0.01)      |
| Income                    | 0.03<br>(0.04)                   | 0.00<br>(0.00)       |
| Education                 | 0.90<br>(1.22)                   | 0.03<br>(0.05)       |
| Democrat                  | 13.82***<br>(3.93)               | 0.52***<br>(0.16)    |
| Republican                | -12.08**<br>(5.57)               | -0.50**<br>(0.23)    |
| Discrimination            | 1.95<br>(3.72)                   | 0.29*<br>(0.15)      |
| Native Born               | -2.59<br>(3.78)                  | -0.04<br>(0.15)      |
| East Asian                | 1.43<br>(3.41)                   | 0.08<br>(0.14)       |
| Constant                  | 33.36*<br>(18.36)                | 2.35***<br>(0.74)    |
| Observations              | 253                              | 251                  |
| R-squared                 | 0.22                             | 0.24                 |

\* p<0.1, \*\* p<0.05, \*\*\* p<0.01. Standard Error in Parentheses.



Table SA.6 Comparison of White Respondents' Demographic Data across both MTurk Samples and the CCES.

|           | Nov. 2016 Survey | Dec. 2016 Survey | 2016 CCES |
|-----------|------------------|------------------|-----------|
| Age       | 38               | 40               | 49        |
| Education | 15               | 15               | 14        |
| Female    | 59               | 49               | 49        |
| Income    | 57               | 65               | 73        |
